# Supplementary material
Source: PubMed Central journal article supplement (PMC3384185)
Supplement: 1120358109_pnas.201120358SI.pdf [file 1120358109_pnas.201120358SI.pdf]

# Supporting Information

Taniguchi Ishikawa et al. 10.1073/pnas.1120358109

## SI Materials and Methods

**Generation of Hematopoietic-Specific Cx43-Deficient Mice.** Animals were bred and housed in the Association for Assessment and Accreditation of Laboratory Animal Care-accredited animal facility of Cincinnati Children's Hospital Medical Center or purchased from Jackson Laboratories. All of the experiments were carried out under approved animal protocols by the Cincinnati Children's Hospital Institutional Animal Committee in conformance with all relevant regulatory standards for animal care. All of the animals were backcrossed for a minimum of five generations into C57BL/6 background. Cx43 gene inactivation in the hematopoietic compartment was performed using Vav1-Cre/Cx43<sup>flox/flox</sup> mice (hematopoietic-H-Cx43-deficient) in which the Cre expression protein was induced by the promoter Vav1 that is expressed in HSC/P (1–3). In each experiment, mice were i.v. injected with 150 mg/kg body weight 5-FU (Sigma) on day 0. BM was harvested on day 4 postadministration from normal and treated mice. BM cells were obtained by crunching murine femora and tibiae. Single BM was obtained by filtration through a 40- $\mu$ m filter. The cells were laid on top of Histopaque-1083 (Sigma) and centrifuged at 450  $\times$  g for 30 min at room temperature to obtain low-density BM (LDBM) cells.

**In Vivo Drug Administration and Peripheral Blood Analysis.** The 5-FU (150 mg/kg; one dose) (APP Pharmaceuticals) was administered intravenously. NAC (100 mg/kg; Sigma) or PBS (control) were administered i.p. Mice were bled on the indicated days. Peripheral blood samples were collected by retroorbital bleeding. Automated total cell count (Drew Scientific) was performed.

**HSC Competitive Repopulation Assay.** Adult recipient mice were lethally irradiated with a <sup>137</sup>Cs  $\gamma$ -irradiator, as described previously (4, 5). For competitive repopulation experiments,  $3 \times 10^6$  CD45.2<sup>+</sup> BM nucleated cells (BMNCs) were mixed with  $3 \times 10^6$  CD45.1<sup>+</sup> BMNCs and were transplanted into lethally irradiated CD45.1<sup>+</sup> B6.SJL<sup>Ptprca Pep3b/BoyJ</sup> recipient mice. Short- and long-term HSC engraftment was analyzed for contribution of CD45.2<sup>+</sup> and lineage markers by flow cytometry.

**Cell Sorting of HSCs and HSC/P Cells.** For sorting of BM HSCs from unchallenged animals, LSK/CD34<sup>-</sup> (HSC) or LSK/CD34<sup>+</sup> (MPP) cells were sorted. LDBM cells were stained with lineage markers [CD45R/B220, Gr-1, CD4, CD8a, CD3e, Ter119, and CD11b (Mac1, M1/70) and c-kit (2B8) and Sca-1/Ly6A/E (D7), CD34 (RAM3.4); Becton Dickinson]. For sorting of HSCs from BM of 5-FU-treated mice, lineage<sup>-</sup>/CD41<sup>-</sup>/CD48<sup>-</sup>/CD150<sup>+</sup> were sorted. LDBM cells were stained with CD45R (B220; clone RA3-6B2), Gr-1 (Ly-6G and Ly-6C; clone RB6-8C5), CD4 (L3T4; clone RM4-5), CD8a (Ly-2; clone 53-6.7), CD3e (clone 145-2C11), Ter119 (Ly-76), CD41 (MWReg30), and CD48 (HM48-1) from BD and anti-CD150 (mShad150) from eBioscience. HSC/P were identified as LSK cells and sorted.

**Proliferation, Cell Cycle, and Survival Assays.** HSC proliferation and survival in vivo were determined as described previously (6). Briefly, for in vivo BrdU proliferation analysis, mice received single i.p. injections of BrdU (300  $\mu$ g). Forty-five minutes later, LDBM cells were stained with CD45R/B220, Gr-1, CD4, CD8a, CD3e, Ter119, CD41, CD48 and CD150. The cells were then fixed and stained with anti-BrdU antibody (Cytofix/Cytoperm Kit; BD Biosciences) according to the manufacturer's instructions. For in vivo Ki67 proliferation analysis, LDBM cells were

prepared and stained for surface markers. The cells were then fixed with cold 70% (vol/vol) ethanol and stained with anti-Ki67 antibody (BD Biosciences) according to the instructions of the manufacturer. For in vivo pyronin Y/7-AAD proliferation analysis, BM cells were prepared and stained for surface markers. The cells were then fixed and stained with 20  $\mu$ g/mL 7-AAD and 1.5  $\mu$ g/mL pyronin Y. For in vivo survival analysis, following with staining of surface markers, LDBM cells were fixed and stained with anti-Caspase-3 antibody (Cytofix/Cytoperm Kit; BD Biosciences). The cells were then fixed and stained with anti-BrdU antibody (Cytofix/Cytoperm Kit; BD Biosciences) according to the instructions of the manufacturer. For in vivo Ki67 proliferation analysis, LDBM cells were prepared and stained for surface markers. The cells were then fixed with cold 70% (vol/vol) ethanol and stained with anti-Ki67 antibody (BD Biosciences) according to the instructions of the manufacturer. For in vivo pyronin Y/7-AAD proliferation analysis, BM cells were prepared and stained for surface markers. The cells were then fixed and stained with 7-AAD and pyronin Y. For in vivo survival analysis, following with staining of surface markers, LDBM cells were fixed and stained with anti-Caspase-3 antibody (Cytofix/Cytoperm Kit; BD Biosciences). Flow cytometric analysis was performed on gated lineage<sup>-</sup>/CD41<sup>-</sup>/CD48<sup>-</sup>/CD150<sup>+</sup> events.

**Lentiviral Cx43 Transduction and Rescue Experiment.** The lentiviral vector pCDH-MCS-EF1-copGFP carrying the sequence of Cx43 was used to produce the virus. The empty vector was used as negative control. Sorted LSK cells were plated onto retronectin (Takara Bio)-coated plates and transduced with lentiviral supernatant at a multiplicity of infection of  $\sim$ 20, supplemented with 100 ng/mL murine stem cell factor (Peprotech) SCF and 50 ng/mL thrombopoietin, and submitted to two rounds of transduction. For the rescue experiment through reexpression of Cx43,  $5 \times 10^3$  transduced WT or H-Cx43-deficient LSK cells (transduced with empty vector or Cx43-containing vectors; with transduction efficiencies of  $69.2 \pm 1.0\%$ ,  $44.07 \pm 3.5\%$ ,  $76.2 \pm 1\%$ ,  $41.42 \pm 2.3\%$  for WT+Mock, WT+Cx43, Cx43-deficient+Mock, and Cx43-deficient+Cx43, respectively;  $n = 2$  independent experiments) were mixed with  $0.5 \times 10^6$  CD45.1<sup>+</sup> BMNCs and transplanted into each lethally irradiated CD45.1<sup>+</sup> B6.SJL<sup>Ptprca Pep3b/BoyJ</sup> recipient mouse. After 4 wk, transplanted mice were i.v. injected with 5-FU and bled on the indicated days. Hematopoietic recovery of CD45.2<sup>+</sup>/GFP<sup>+</sup>/CD11b<sup>+</sup> cell counts in peripheral blood was determined by flow cytometry and cell counts. For the rescue experiment of ROS transfer, GFP-positive HSC/P cells were sorted after transduction and used for the experiment as described below.

**Generation of H-Cx43-Deficient Chimeric Mice and HM Cx43-Deficient Mice.** Confirmatory experiments on hematopoietic chimeras of Vav1-Cre;WT or Vav1-Cre;Cx43<sup>flox/flox</sup> BM cells were performed as follows. A total of  $3 \times 10^6$  BMNCs from Vav1-Cre;WT or Vav1-Cre;Cx43<sup>flox/flox</sup> were transplanted into lethally irradiated CD45.1<sup>+</sup> B6.SJL<sup>Ptprca Pep3b/BoyJ</sup> mice. For experiments on HM H-Cx43-deficient mice, Mx1-Cre;WT or Mx1-Cre;Cx43<sup>flox/flox</sup> mice received 300  $\mu$ g of polyI:C (Amersham/Pharmacia) every other day for 16 d i.p. One week after the last polyI:C injection, mice were bled to analyze Cx43 genomic deletion as reported previously by our group (7, 8). BM Cx43-deficient mice were lethally irradiated, and  $3 \times 10^6$  WT CD45.1<sup>+</sup> B6.SJL<sup>Ptprca Pep3b/BoyJ</sup> BM cells were transplanted i.v. to generate HM Cx43-deficient mice.

Eight weeks posttransplantation, mice were challenged with 5-FU as aforementioned.

**ROS, Mitochondrial Mass, and Mitochondrial Membrane Potential Analyses.** LDBM cells were stained for surface markers (lineage makers/CD41/CD48/CD150). Cells were incubated with 5 mM DCF-DA (20-70-dichlorofluorescein diacetate; Molecular Probes), 50  $\mu$ M DHE (Molecular Probes) for 30 min at 37 °C or with 5  $\mu$ M MitoSOX Red mitochondrial superoxide indicator (Molecular Probes) for 10 min at 37 °C, followed by flow cytometric analysis. Mitochondrial mass and membrane potential were determined by MitoTracker Green FM (Molecular Probes) and MitoTrackerRed FM (Molecular Probes), respectively.

**ROS Transfer.** LSK cells ( $1 \times 10^4$  cells/sample) were treated with or without 5  $\mu$ M LY83583 (6-anilino-5,8-quinolinequinone; Sigma-Aldrich) for 16 h at 37 °C and stained with 5  $\mu$ M carboxyfluorescein diacetate, succinimidyl ester (CFSE) (Molecular Probes). FBMD-1 stromal cells ( $1 \times 10^3$  cells/sample) were plated into a 96-well plate and were incubated with 10 mM NAC for 16 h and stained with 50  $\mu$ M DHE. Cells were washed in PBS. After that, LSK cells were cocultured with FBMD-1 stromal cells in NAC-containing medium in each of 96 wells for 3 h at 37 °C, followed by flow cytometric analysis.

**Analysis of MAPK or p38 Signaling Pathway.** LDBM cells were stained for surface markers (lineage makers/CD41/CD48/CD150). The cells were then fixed with cold methanol and stained with anti-phospho ERK antibody, anti-phospho p38, or anti-isotype IgG antibody (BD Biosciences), followed by flow cytometric analysis.

**Immunofluorescence Analysis.** For Cx43, Cx45, p53, and p16 staining, HSCs were seeded on poly-lysine-coated glass coverslips and fixed with 4% paraformaldehyde in PBS for 15 min at room temperature and gently washed with PBS. Cells were permeabilized with 0.2% Triton X-100 (Sigma) in PBS for 20 min and blocked with 5% goat serum plus 1% BSA in PBS for 1 h at room temperature. Incubations with primary and secondary antibodies were performed overnight at 4 °C. The primary antibodies used were anti-Cx43 (rabbit polyclonal; 1:100) and anti-Cx45 (rabbit polyclonal; 1:100), both from Invitrogen; anti-phospho-p53 antibody (1:100) and anti-p53 antibody (1:100) (both from Cell Signaling); and anti-p16 antibody (1:50) (from Santa Cruz). Coverslips were mounted with Pro-Long Gold Antifade Reagent (Invitrogen). Immunofluorescence samples were analyzed using confocal microscopy (Zeiss). A total of 30–50 individual HSCs were analyzed per sample. The intensity of the fluorescence was analyzed and

quantified using computer-imaging software (Axiovision; Carl Zeiss). For Cx staining, freshly sorted HSCs were seeded on fibronectin-coated glass coverslips. After 1 h of incubation at 37 °C (5% CO<sub>2</sub>, 3% O<sub>2</sub>), HSCs were fixed with 4% paraformaldehyde in PBS for 15 min at 4 °C and gently washed with PBS. Cells were permeabilized with 0.2% Triton X-100 in PBS for 20 min and blocked with 10% donkey serum (Sigma) for 30 min. Incubations with primary and secondary antibodies were performed overnight at 4 °C. The primary antibodies used were anti-Cx43 antibody (1:70) (Invitrogen) and anti-Cx45 antibody (1:100) (Chemicon). Immunofluorescence samples were analyzed using fluorescence microscopy (AxioObserver Z1 equipped with a 63 $\times$  phase contrast objective and appropriate fluorescence filters; Zeiss). A total of 20 individual HSCs were analyzed per sample.

**Genomic PCR Analysis.** Genomic PCR analysis was performed as described previously by our group (7, 8).

**RT-PCR Analysis.** Total RNA was isolated from sorted HSCs using RNeasy Micro Kit (Qiagen). Isolated RNA was reverse-transcribed with Multiscribe Reverse Transcriptase (Applied Biosystems), followed by amplification of cDNA using TaqMan Universal PCR Master Mix (Applied Biosystems). GAPDH was used as an internal control.

**Microarray Analysis.** Total RNA from sorted LSK cells was isolated using the RNeasy Micro Kit (Qiagen). The cDNA was then hybridized according to the protocol of the manufacturer to the Affymetrix GeneChip Mouse Exon 1.0 ST Array. The RNA quality and quantity assessment, probe preparation, labeling, hybridization, and image scan were carried out in the Cincinnati Children's Hospital Medical Center Affymetrix Core using standard procedures. Hybridization data were sequentially subjected to normalization, transformation, filtration, functional classification, and pathway analysis. Data analysis was performed with Genespring GX11 (Agilent Technologies). Genes that were differentially expressed in Cx43-deficient LSK (5-FU) ( $n = 3$ ) compared with WT LSK (5-FU) ( $n = 3$ ) cells with fold change by 1.5 ( $P < 0.05$ ) were analyzed in Ingenuity Pathways Analysis (Ingenuity Systems) to group into a specific pathway. The top signaling pathways were considered to be overly represented when unpaired Student  $t$  test  $P$  value was  $\leq 0.05$ . GJ genes were also compared for significant changes ( $P < 0.05$ ).

**Statistical Analysis.** Statistical significance was assessed by Student  $t$  test or ANOVA test for independent samples. Statistically significant differences were considered at  $P < 0.05$ .

1. Daria D, et al. (2008) The retinoblastoma tumor suppressor is a critical intrinsic regulator for hematopoietic stem and progenitor cells under stress. *Blood* 111:1894–1902.
2. Ghiara G, et al. (2008) Rac1 is essential for intraembryonic hematopoiesis and for the initial seeding of fetal liver with definitive hematopoietic progenitor cells. *Blood* 111:3313–3321.
3. Sengupta A, et al. (2011) Atypical protein kinase C (aPKCzeta and aPKClambda) is dispensable for mammalian hematopoietic stem cell activity and blood formation. *Proc Natl Acad Sci USA* 108:9957–9962.
4. Gu Y, et al. (2003) Hematopoietic cell regulation by Rac1 and Rac2 guanosine triphosphatases. *Science* 302:445–449.
5. Cancelas JA, et al. (2005) Rac GTPases differentially integrate signals regulating hematopoietic stem cell localization. *Nat Med* 11:886–891.
6. Sengupta A, Arnett J, Dunn S, Williams DA, Cancelas JA (2010) Rac2 GTPase deficiency depletes BCR-ABL+ leukemic stem cells and progenitors in vivo. *Blood* 116:81–84.
7. Presley CA, et al. (2005) Bone marrow connexin-43 expression is critical for hematopoietic regeneration after chemotherapy. *Cell Commun Adhes* 12:307–317.
8. Presley CA, Cancelas JA (2007) Isolation of high-quality genomic DNA from murine bone marrow samples using the ChargeSwitch gDNA Blood kit with a modified protocol. *Quest* 4:11–16.

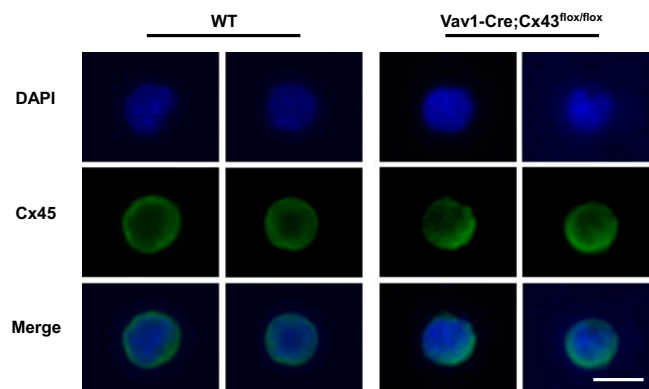

**Fig. S1.** Cx45 expression is not altered in H-Cx43-deficient HSCs. Immunofluorescence pictures showing Cx45 (green) along with DAPI (blue) in WT or H-Cx43-deficient HSCs. Cx45 is detected around the cell membrane both in WT HSCs and H-Cx43-deficient HSCs ( $n = 20$  HSCs from individual mouse;  $n = 3$  mice per group). (Scale bar,  $5 \mu\text{m}$ .)

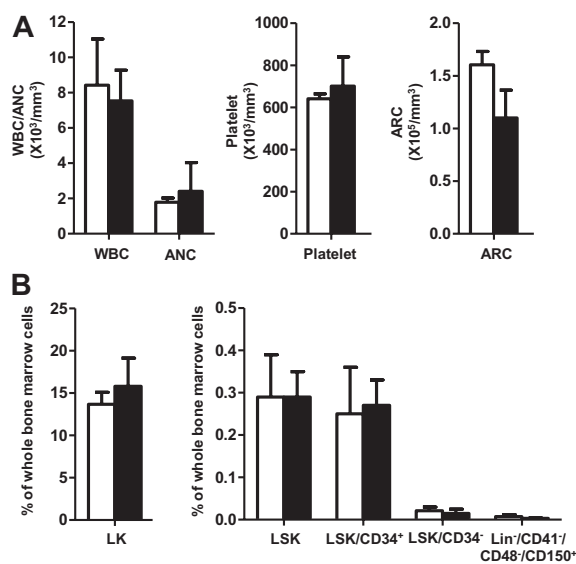

**Fig. S2.** Lineage cells in peripheral blood and HSC/P content in BM are not altered in H-Cx43-deficient mice. Peripheral blood count of WT (open bars) or H-Cx43-deficient mice (solid bars) is shown. (A) Whole blood count (WBC), absolute neutrophil counts (ANC), platelet counts and absolute reticulocyte count (ARC) ( $n = 3$  mice per group). (B) The content of LK, LSK, LSK/CD34<sup>+</sup>, LSK/CD34<sup>-</sup>, and Lin<sup>-</sup>/CD41<sup>-</sup>/CD48<sup>-</sup>/CD150<sup>+</sup> in BM were measured by FACS analysis ( $n = 11$  mice per group).

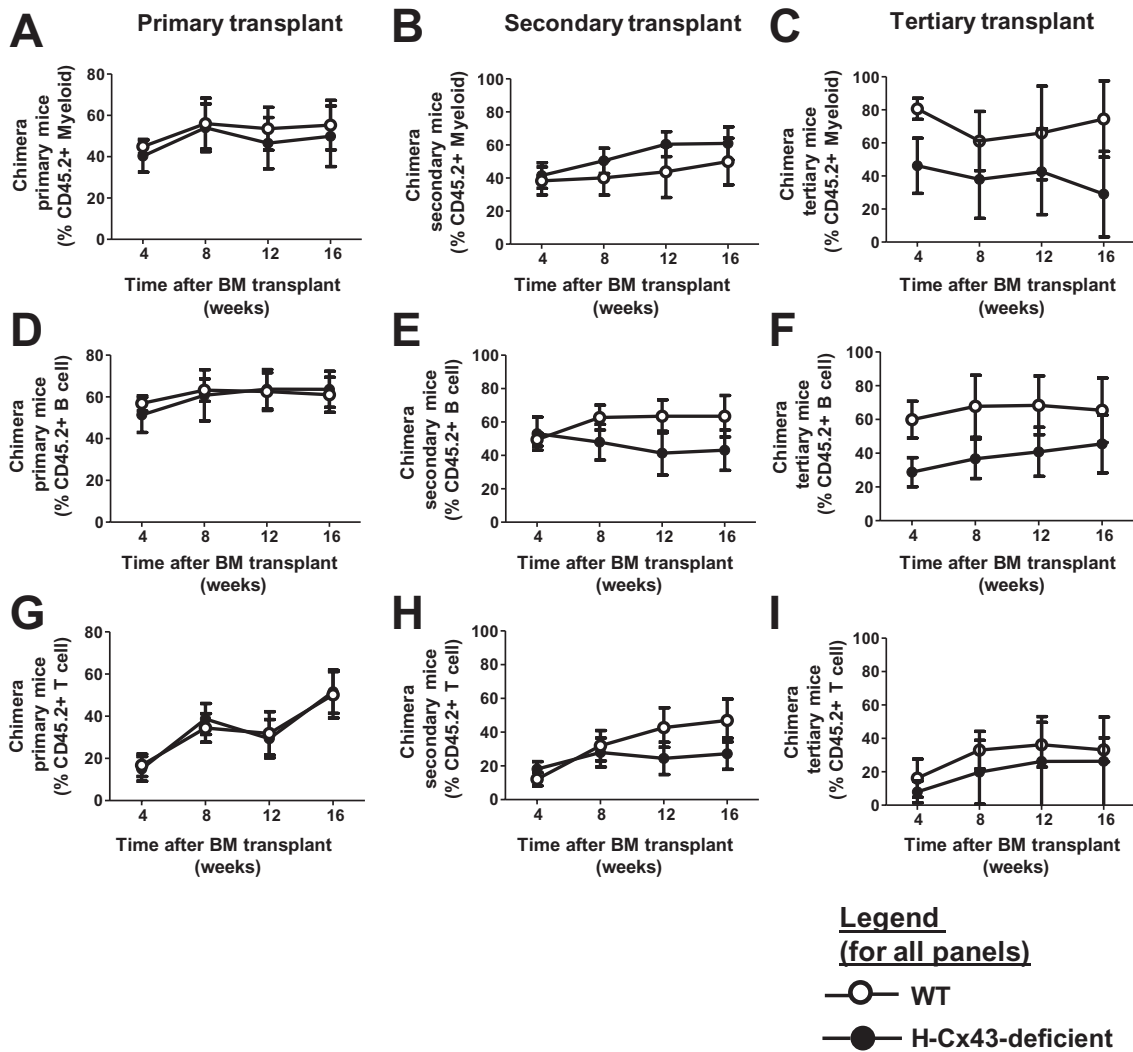

**Fig. S3.** Peripheral blood lineage cells in long-term competitive repopulation assay of H-Cx43-deficient mice. Lethally irradiated primary recipient CD45.1<sup>+</sup> mice were transplanted with a mixture of Vav1-Cre; H-Cx43-deficient BM cells (CD45.2<sup>+</sup>) and WT BM (CD45.1<sup>+</sup>) cells (solid circles). Control group was transplanted with a mixture of Vav1-Cre; WT BM cells (CD45.2<sup>+</sup>) and WT BM (CD45.1<sup>+</sup>) cells (open circles). (A–C) Peripheral blood myeloid (CD45.2<sup>+</sup>/Mac-1<sup>+</sup>). (D–F) B cell (CD45.2<sup>+</sup>/B-220<sup>+</sup>). (G–I) T cell (CD45.2<sup>+</sup>/CD3<sup>+</sup>) from primary (Fig. 1G), secondary (Fig. 1H), and tertiary (Fig. 1I) transplant recipients (*n* = 2 independent experiments; *n* = 8–16 mice per group and experiment).

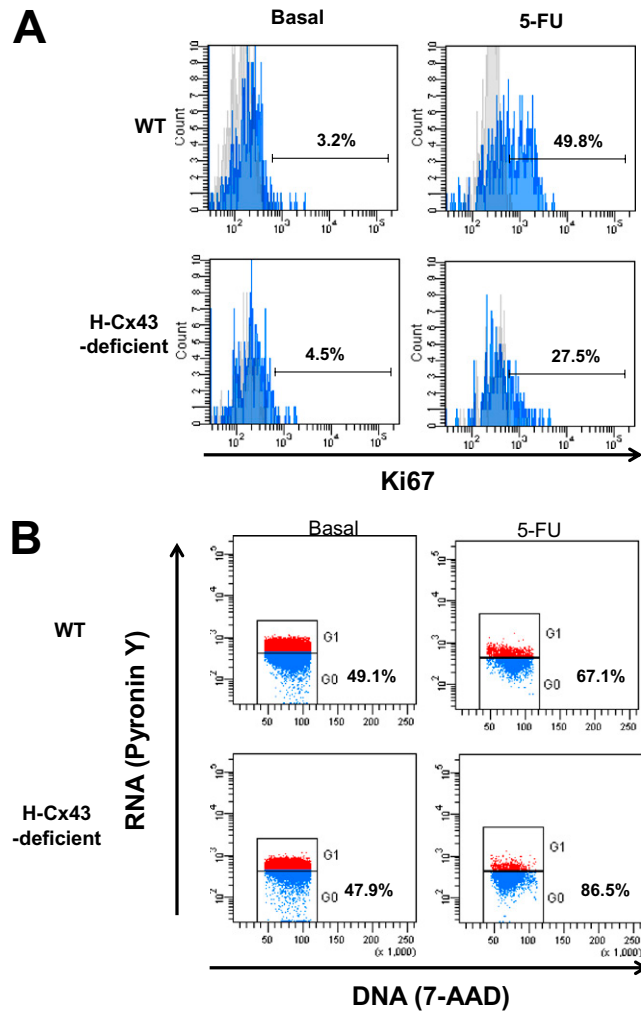

**Fig. S4.** Impaired cell cycle entry after 5-FU administration in H-Cx43-deficient HSCs. (*A* and *B*) Representative examples of flow cytometric analysis of Fig. 2 *B* and *C*. (*A*) Representative example of Ki67 staining (Fig. 2*B*) on Lin<sup>-</sup>/CD41<sup>-</sup>/CD48<sup>-</sup>/CD150<sup>+</sup> BM cells. Blue, anti-Ki67 staining; gray, isotype control. (*B*) Representative example of 7-AAD/pyronin Y staining (Fig. 2*C*) on Lin<sup>-</sup>/CD41<sup>-</sup>/CD48<sup>-</sup>/CD150<sup>+</sup> BM cells.

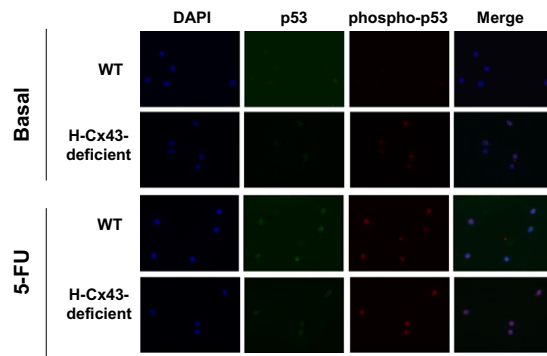

**Fig. S5.** Immunohistochemistry of p53 and phospho-p53. Representative example of immunofluorescence staining for p53 (green) and phospho-p53 (red) along with DAPI (blue) in WT or H-Cx43-deficient BM HSCs from untreated (basal) and 5-FU (96 h)-treated animals.

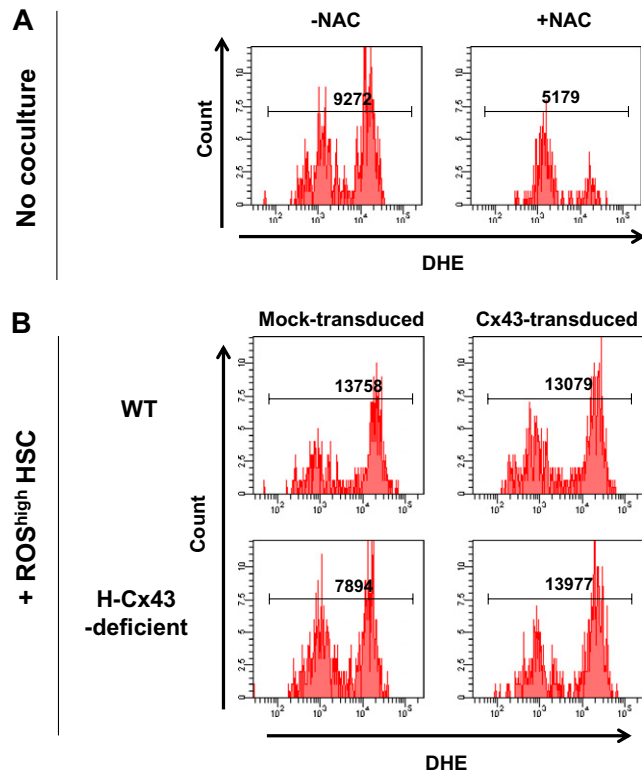

**Fig. S6.** Lentivirus Cx43 transduction rescues the impaired ROS transfer of H-Cx43-deficient HSCs into stromal cells. Representative examples of flow cytometric analysis of ROS uptake by BM stromal cells after coculture with ROS<sup>high</sup> HSCs. (A) MFI of DHE in FBMD-1 without (*Left*) or with (*Right*) NAC treatment without coculture with HSCs. (B) FBMD-1, treated with NAC, was cocultured with WT (upper plots) or H-Cx43-deficient (lower plots) HSCs transduced with empty vector (left plots) or Cx43 vector (right plots). HSCs were treated with LY83583 to induce ROS (ROS<sup>high</sup> HSCs) before coculture. Note that FBMD-1 is a heterocellular line with two populations with different levels of ROS. Coculture with ROS<sup>high</sup> HSCs translates into an increase in the frequency of ROS<sup>high</sup> FBMD-1 cells.



**Table S1. Differential expression of gap junction genes ( $P < 0.05$ )**

| Symbol | Entrez gene name                      | Fold change |
|--------|---------------------------------------|-------------|
| Gja1   | Gap junction $\alpha$ -1; Connexin-43 | -6.09       |
| Gja4   | Gap Junction $\alpha$ -4; Connexin-50 | 1.13        |
| Gja8   | Gap Junction $\alpha$ -8; Connexin-37 | 1.17        |

Transcript profiles of CD150<sup>+</sup>/CD48<sup>-</sup>/CD41<sup>-</sup>/lineage<sup>-</sup> cells isolated from WT or H-Cx43-deficient mice after 5-FU treatment were analyzed by Affymetrix exon array. Affymetrix hybridization of cDNA was performed in triplicate. The expression of all other connexin genes was found not to be significantly changed in 5-FU-treated Cx43-deficient BM HSCs.

**Table S2. Ingenuity top Tox signaling pathway analysis ( $P < 0.05$ )**

| Symbol                            | Entrez gene name                                                       | Fold change |
|-----------------------------------|------------------------------------------------------------------------|-------------|
| <b>Oxidative stress response</b>  |                                                                        |             |
| MGST1                             | microsomal glutathione S-transferase (GST) 1                           | -2.448      |
| GCLM                              | glutamate-cysteine ligase, modifier subunit                            | -1.889      |
| PRDX1                             | peroxiredoxin 1                                                        | -1.866      |
| DNAJB11                           | DnaJ (Hsp40) homolog, subfamily B, member 11                           | -1.691      |
| RRAS                              | related RAS viral (r-ras) oncogene homolog                             | -1.646      |
| MAFF                              | v-maf musculoaponeurotic fibrosarcoma oncogene homolog F (avian)       | -1.628      |
| MGST2                             | microsomal GST 2                                                       | -1.547      |
| Cyp2j9                            | cytochrome P450, family 2, subfamily j, polypeptide 9                  | -1.536      |
| GSTM5                             | GST $\mu$ 5                                                            | -1.534      |
| DNAJC1                            | DnaJ (Hsp40) homolog, subfamily C, member 1                            | -1.51       |
| EIF2AK3                           | eukaryotic translation initiation factor 2- $\alpha$ kinase 3          | 1.552       |
| PRKCB                             | protein kinase C, $\beta$                                              | 1.582       |
| SQSTM1                            | sequestosome 1                                                         | 1.584       |
| EPHX1                             | epoxide hydrolase 1, microsomal (xenobiotic)                           | 1.604       |
| HMOX1                             | heme oxygenase (decycling) 1                                           | 1.679       |
| MAP3K7 (includes EG:172842)       | mitogen-activated protein kinase kinase kinase 7                       | 1.695       |
| MAP3K1                            | mitogen-activated protein kinase kinase kinase 1                       | 1.764       |
| NRAS                              | neuroblastoma RAS viral (v-ras) oncogene homolog                       | 1.834       |
| GSTO1                             | GST $\omega$ 1                                                         | 1.644       |
| DNAJC13                           | DnaJ (Hsp40) homolog, subfamily C, member 13                           | 2.962       |
| <b>Glutathione depletion</b>      |                                                                        |             |
| MGST1                             | microsomal GST 1                                                       | -2.448      |
| CCNG1                             | cyclin G1                                                              | -1.697      |
| MGST2                             | microsomal GST 2                                                       | -1.547      |
| GSTM5                             | GST $\mu$ 5                                                            | -1.534      |
| EPHX1                             | epoxide hydrolase 1, microsomal (xenobiotic)                           | 1.604       |
| GSTO1                             | GST $\omega$ 1                                                         | 1.644       |
| <b>G1/S checkpoint</b>            |                                                                        |             |
| RB1                               | retinoblastoma 1                                                       | 1.696       |
| BTRC                              | $\beta$ -transducin repeat containing protein                          | 1.746       |
| CDK6                              | cyclin-dependent kinase 6                                              | 1.707       |
| TGFB1 (includes EG:21803)         | transforming growth factor, $\beta$ 1                                  | 2.135       |
| E2F3                              | E2F transcription factor 3                                             | 2.165       |
| <b>G2/M DNA damage checkpoint</b> |                                                                        |             |
| CDK7                              | cyclin-dependent kinase 7                                              | -1.892      |
| CKS1B                             | CDC28 protein kinase regulatory subunit 1B                             | -1.65       |
| Ccnb1                             | cyclin B1                                                              | -1.579      |
| CKS2                              | CDC28 protein kinase regulatory subunit 2                              | -1.515      |
| BTRC                              | $\beta$ -transducin repeat containing                                  | 1.746       |
| <b>Cell death</b>                 |                                                                        |             |
| NDUFAB1                           | NADH dehydrogenase (ubiquinone) 1, $\alpha/\beta$ subcomplex, 1, 8 kDa | -2.776      |
| TMX1                              | thioredoxin-related transmembrane protein 1                            | -2.738      |
| TRPS1                             | trichorhinophalangeal syndrome I                                       | -2.637      |
| SIAH1                             | seven in absentia homolog 1 ( <i>Drosophila</i> )                      | -1.901      |
| CCNI                              | cyclin I                                                               | -1.896      |
| CFLAR                             | CASP8 and FADD-like apoptosis regulator                                | -1.771      |
| PTN                               | pleiotrophin                                                           | -1.742      |
| NAMPT                             | nicotinamide phosphoribosyltransferase                                 | -1.644      |
